# Supplementary figures and images for: Effect of Silver Nanoparticles and Essential Oils against Multidrug Resistant Staphylococcus pseudintermedius: An In Vitro Study
Source: Preprints.org preprint supplement (doi:10.20944/preprints202311.1528.v1), 2023-11-23

Figure S1: S/V ratio


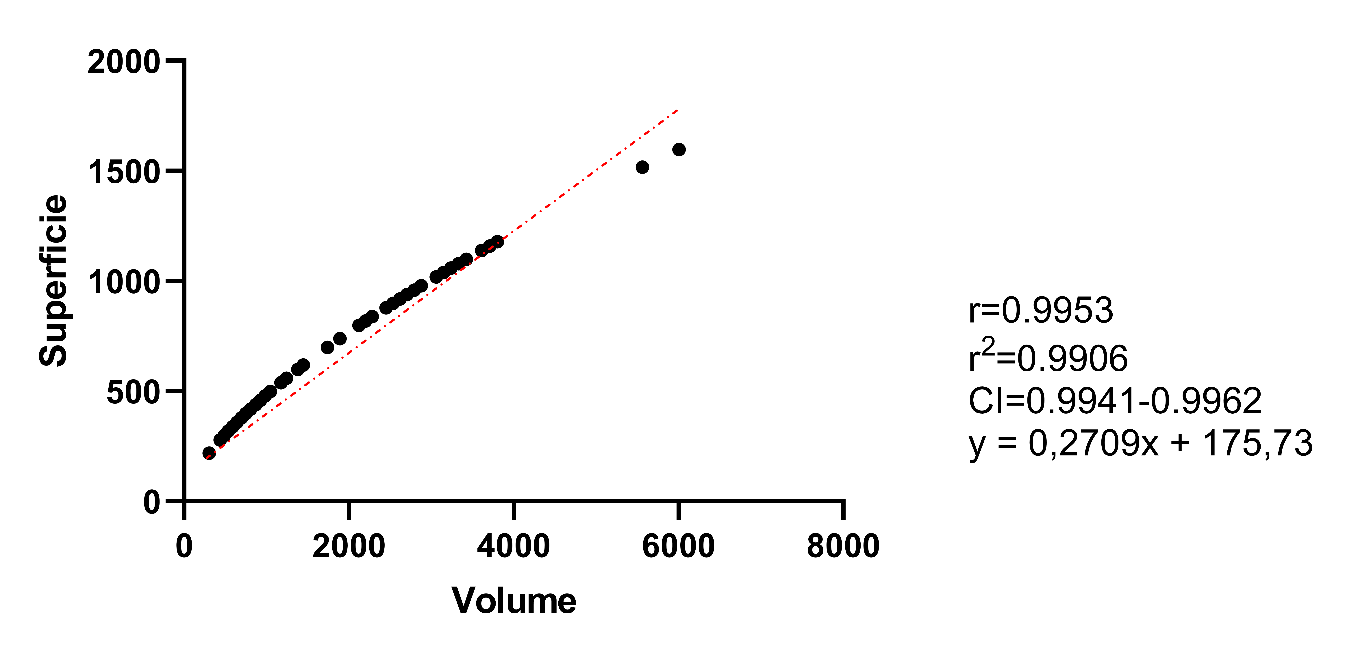

Supplement: Supplementary file 1 [file Figure S1.docx]
